# Supplementary material for: Effect of joint transition visits on quality of life in adolescents with inflammatory bowel diseases: a protocol for a prospective, randomised, multicentre, controlled trial (TRANS-IBD)
Source: PubMed Central journal article supplement — BMJ Open. 2020 Oct 6;10(10):e038410. doi: 10.1136/bmjopen-2020-038410 (PMC7539589; doi:10.1136/bmjopen-2020-038410), 2020-10-06
Supplement: bmjopen-2020-038410supp003.pdf [file bmjopen-2020-038410supp003.pdf]

Patient's name: \_\_\_\_\_ Date of birth: \_\_\_/\_\_\_/\_\_\_ (TRANS-IBD code# \_\_\_\_\_)  
 Form completion date (year/month/day/ hour: minute): \_\_\_/\_\_\_/\_\_\_:\_\_\_:\_\_\_

### TRANS-IBD Visit 1

| Assessment                                                | Notes                                                                                     |                                                                                                                                                                                                             |                                 |
|-----------------------------------------------------------|-------------------------------------------------------------------------------------------|-------------------------------------------------------------------------------------------------------------------------------------------------------------------------------------------------------------|---------------------------------|
| Checking inclusion and exclusion criteria                 | Use the eligibility checklist                                                             | <input type="checkbox"/> Yes                                                                                                                                                                                | <input type="checkbox"/> No     |
| Informed consent                                          | The participating adolescent and the legal guardian signed the informed consent statement | <input type="checkbox"/> Yes                                                                                                                                                                                | <input type="checkbox"/> No     |
| Randomisation                                             | Based on the randomisation list prepared for the participating IBD centre                 | <input type="checkbox"/> Yes                                                                                                                                                                                | <input type="checkbox"/> No     |
| Patient education                                         | Based on appendix 'Information sheet' prepared for TRANS-IBD visit 1                      | <input type="checkbox"/> Yes                                                                                                                                                                                | <input type="checkbox"/> No     |
| <b>Demographic data</b>                                   |                                                                                           |                                                                                                                                                                                                             |                                 |
| Date of birth                                             | year. month. day                                                                          | □□□□.□□.□□.                                                                                                                                                                                                 |                                 |
| Sex                                                       |                                                                                           | <input type="checkbox"/> male                                                                                                                                                                               | <input type="checkbox"/> female |
| Race/ Ethnicity                                           | Based on self-declaration                                                                 | <input type="checkbox"/> White <input type="checkbox"/> Romany <input type="checkbox"/> Asian <input type="checkbox"/> afro<br>American <input type="checkbox"/> Other: .....                               |                                 |
| Current studies                                           |                                                                                           | <input type="checkbox"/> primary school <input type="checkbox"/> vocational training<br><input type="checkbox"/> secondary school <input type="checkbox"/> gymnasium school                                 |                                 |
| Housing conditions                                        |                                                                                           | <input type="checkbox"/> house with a garden <input type="checkbox"/> row house <input type="checkbox"/><br>apartment house <input type="checkbox"/> block of flats <input type="checkbox"/><br>Other:..... |                                 |
| Family member living with the child in the same household |                                                                                           | <input type="checkbox"/> parent(s) <input type="checkbox"/> brother(s)<br><input type="checkbox"/> grandparent(s)                                                                                           |                                 |
| Number of brothers                                        |                                                                                           | <input type="checkbox"/> 0 <input type="checkbox"/> 1 <input type="checkbox"/> 2 <input type="checkbox"/> more than 2,                                                                                      |                                 |

Patient's name: \_\_\_\_\_ Date of birth: \_\_\_/\_\_\_/\_\_\_ (TRANS-IBD code# \_\_\_\_\_)  
 Form completion date (year/month/day/ hour: minute): \_\_\_/\_\_\_/\_\_\_:\_\_\_:\_\_\_

|                                                          |                               |                                                                                                                                                                                                                                                                                                                                           |                                                |
|----------------------------------------------------------|-------------------------------|-------------------------------------------------------------------------------------------------------------------------------------------------------------------------------------------------------------------------------------------------------------------------------------------------------------------------------------------|------------------------------------------------|
|                                                          |                               | if more than 2, number: .....                                                                                                                                                                                                                                                                                                             |                                                |
| Family status of parents                                 |                               | <input type="checkbox"/> married <input type="checkbox"/> divorced <input type="checkbox"/> widow                                                                                                                                                                                                                                         |                                                |
| Highest education level of the mother                    |                               | <input type="checkbox"/> primary school <input type="checkbox"/> vocational training<br><input type="checkbox"/> secondary school <input type="checkbox"/> college<br><input type="checkbox"/> university                                                                                                                                 |                                                |
| Highest education level of the father                    |                               | <input type="checkbox"/> primary school <input type="checkbox"/> vocational training<br><input type="checkbox"/> secondary school <input type="checkbox"/> college<br><input type="checkbox"/> university                                                                                                                                 |                                                |
| Smoking habits                                           |                               | <input type="checkbox"/> smoking <input type="checkbox"/> not smoking                                                                                                                                                                                                                                                                     |                                                |
| <b>Medical history</b>                                   |                               |                                                                                                                                                                                                                                                                                                                                           |                                                |
| Date of the diagnosis                                    | year. month. day              | <input type="checkbox"/> <input type="checkbox"/> <input type="checkbox"/> <input type="checkbox"/> . <input type="checkbox"/> <input type="checkbox"/> . <input type="checkbox"/> <input type="checkbox"/> .                                                                                                                             |                                                |
| Disease type                                             |                               | <input type="checkbox"/><br>Crohn's disease                                                                                                                                                                                                                                                                                               | <input type="checkbox"/><br>ulcerative colitis |
| Localisation of the disease at the time of the diagnosis | In case of Crohn's disease    | <input type="checkbox"/> L1: distal 1/3 ileum or limited cecal disease<br><input type="checkbox"/> L2: colonic <input type="checkbox"/> L3: ileocolonic <input type="checkbox"/> L4a: upper disease proximal to ligament Treitz<br><input type="checkbox"/> L4b: upper disease distal to ligament Treitz and proximal to distal 1/3 ileum |                                                |
| Behaviour of the disease at the time of the diagnosis    | In case of Crohn's disease    | <input type="checkbox"/> B1: nonstricturing, nonpenetrating<br><input type="checkbox"/> B2: stricturing<br><input type="checkbox"/> B3: penetrating                                                                                                                                                                                       |                                                |
| Localisation of the disease at the time of the diagnosis | In case of ulcerative colitis | <input type="checkbox"/> E1: proctitis <input type="checkbox"/> E2: left-sided colitis                                                                                                                                                                                                                                                    |                                                |

Patient's name: \_\_\_\_\_ Date of birth: \_\_\_/\_\_\_/\_\_\_ (TRANS-IBD code# \_\_\_\_\_)  
 Form completion date (year/month/day/ hour: minute): \_\_\_/\_\_\_/\_\_\_:\_\_\_:\_\_\_

|                                                     |                                                                                                       |                                                                                                                                                                                                                                                                                                                           |                             |
|-----------------------------------------------------|-------------------------------------------------------------------------------------------------------|---------------------------------------------------------------------------------------------------------------------------------------------------------------------------------------------------------------------------------------------------------------------------------------------------------------------------|-----------------------------|
|                                                     |                                                                                                       | <input type="checkbox"/> E3: extensive colitis <input type="checkbox"/> E4: pancolitis                                                                                                                                                                                                                                    |                             |
| Perianal manifestation at the time of the diagnosis | The presence of perianal fistula, abscess at the time of the diagnosis                                | <input type="checkbox"/> Yes                                                                                                                                                                                                                                                                                              | <input type="checkbox"/> No |
| Surgeries                                           | Surgeries performed because of IBD                                                                    | <input type="checkbox"/> Yes, if yes type:<br><input type="checkbox"/> Proctocolectomy + IPAA<br><input type="checkbox"/> proctocolectomy + ileostomy<br><input type="checkbox"/> resection<br><input type="checkbox"/> abscess drainage<br><input type="checkbox"/> fistulotomy<br><input type="checkbox"/> seton lacing |                             |
| Comorbidity                                         | Every other disease, which is treated with medicine(s) or why the patient is needed to be followed up | <input type="checkbox"/> Yes, if yes: .....                                                                                                                                                                                                                                                                               | <input type="checkbox"/> No |
| <b>Date of the last endoscopy</b>                   | year. month. day                                                                                      | <input type="checkbox"/> <input type="checkbox"/> <input type="checkbox"/> <input type="checkbox"/> . <input type="checkbox"/> <input type="checkbox"/> . <input type="checkbox"/> <input type="checkbox"/> .<br>Type: upper/lower GI endoscopy<br>Results:.....                                                          |                             |
| <b>Previous medications</b>                         | Previous medications applied since the diagnosis                                                      |                                                                                                                                                                                                                                                                                                                           |                             |
| Exclusive enteral nutrition                         | Consumption of only nutrition formulas for at least 6 weeks                                           | <input type="checkbox"/> Yes                                                                                                                                                                                                                                                                                              | <input type="checkbox"/> No |
| 5-ASA                                               | Any drug formats (tablet, suppository, enema)                                                         | <input type="checkbox"/> Yes                                                                                                                                                                                                                                                                                              | <input type="checkbox"/> No |
| Steroid                                             | Systemic steroid or budesonide preparation                                                            | <input type="checkbox"/> Yes, if yes, how many times:.....                                                                                                                                                                                                                                                                | <input type="checkbox"/> No |
| Azathioprine                                        |                                                                                                       | <input type="checkbox"/> Yes                                                                                                                                                                                                                                                                                              | <input type="checkbox"/> No |
| Other immunosuppressants                            | e.g.: 6-mercaptopurine, tacrolimus, methotrexate                                                      | <input type="checkbox"/> Yes                                                                                                                                                                                                                                                                                              | <input type="checkbox"/> No |
| Biological treatment                                | More answers can be marked                                                                            | <input type="checkbox"/> no <input type="checkbox"/> infliximab <input type="checkbox"/> adalimumab<br><input type="checkbox"/> vedolizumab                                                                                                                                                                               |                             |
| <b>Physical examination</b>                         |                                                                                                       |                                                                                                                                                                                                                                                                                                                           |                             |
| Body height                                         | given in centimeter                                                                                   | <input type="checkbox"/> <input type="checkbox"/> <input type="checkbox"/> cm                                                                                                                                                                                                                                             |                             |
| Bodyweight                                          | given in kilogramm                                                                                    | <input type="checkbox"/> <input type="checkbox"/> <input type="checkbox"/> kg                                                                                                                                                                                                                                             |                             |

Patient's name: \_\_\_\_\_ Date of birth: \_\_\_/\_\_\_/\_\_\_ (TRANS-IBD code# \_\_\_\_\_)  
 Form completion date (year/month/day/ hour: minute): \_\_\_/\_\_\_/\_\_\_:\_\_\_:\_\_\_

|                                                                                                              |                                                                                                            |                                                                                                                                                                                                                        |                             |
|--------------------------------------------------------------------------------------------------------------|------------------------------------------------------------------------------------------------------------|------------------------------------------------------------------------------------------------------------------------------------------------------------------------------------------------------------------------|-----------------------------|
| Abdominal tenderness                                                                                         |                                                                                                            | <input type="checkbox"/> Yes                                                                                                                                                                                           | <input type="checkbox"/> No |
| Abdominal defense                                                                                            |                                                                                                            | <input type="checkbox"/> Yes                                                                                                                                                                                           | <input type="checkbox"/> No |
| Palpable abdominal mass                                                                                      |                                                                                                            | <input type="checkbox"/> Yes                                                                                                                                                                                           | <input type="checkbox"/> No |
| Perianal fistula                                                                                             | Presence of perianal fistula, abscess                                                                      | <input type="checkbox"/> Yes                                                                                                                                                                                           | <input type="checkbox"/> No |
| Extraintestinal manifestations                                                                               | IBD related manifestations outside the GI tract                                                            | <input type="checkbox"/> Yes, if yes, type:<br><input type="checkbox"/> skin symptom<br><input type="checkbox"/> joint symptom<br><input type="checkbox"/> eye symptom<br><input type="checkbox"/> liver symptom (PSC) | <input type="checkbox"/> No |
| <b>Names of the currently taken IBD related drugs</b>                                                        | <b>Drug format</b><br>(e.g.: pill, granulate, suppository)                                                 | <b>Drug dose</b><br>(e.g.: 1x 500 mg)                                                                                                                                                                                  |                             |
|                                                                                                              |                                                                                                            |                                                                                                                                                                                                                        |                             |
|                                                                                                              |                                                                                                            |                                                                                                                                                                                                                        |                             |
|                                                                                                              |                                                                                                            |                                                                                                                                                                                                                        |                             |
|                                                                                                              |                                                                                                            |                                                                                                                                                                                                                        |                             |
|                                                                                                              |                                                                                                            |                                                                                                                                                                                                                        |                             |
|                                                                                                              |                                                                                                            |                                                                                                                                                                                                                        |                             |
| <b>Name of the drugs which caused any kind of side effect since the medical treatment of IBD was started</b> |                                                                                                            | <b>Side effect</b>                                                                                                                                                                                                     |                             |
|                                                                                                              |                                                                                                            |                                                                                                                                                                                                                        |                             |
|                                                                                                              |                                                                                                            |                                                                                                                                                                                                                        |                             |
|                                                                                                              |                                                                                                            |                                                                                                                                                                                                                        |                             |
|                                                                                                              |                                                                                                            |                                                                                                                                                                                                                        |                             |
| <b>Disease activity indices have been filled out</b>                                                         | In case of Crohn's disease: PCDAI, CDAI/ perianal CDAI<br>In case of ulcerative Colitis: PUCAI, Mayo score | <input type="checkbox"/> Yes PCDAI:.....<br>PUCAI:..... Mayo score:.....<br>CDAI:..... pCDAI:.....                                                                                                                     | <input type="checkbox"/> No |
| <b>Health care utilisation in the previous 3 months due to IBD</b>                                           |                                                                                                            |                                                                                                                                                                                                                        |                             |
| The use of urgent healthcare service at the caring gastroenterology unit                                     | Every medical visit which was not arranged in advance with the caring gastroenterologist                   | <input type="checkbox"/> Yes, number:.....                                                                                                                                                                             | <input type="checkbox"/> No |
| The use of urgent healthcare service in the emergency department                                             |                                                                                                            | <input type="checkbox"/> Yes, number:.....                                                                                                                                                                             | <input type="checkbox"/> No |

Patient's name: \_\_\_\_\_ Date of birth: \_\_\_/\_\_\_/\_\_\_ (TRANS-IBD code# \_\_\_\_\_)  
 Form completion date (year/month/day/ hour: minute): \_\_\_/\_\_\_/\_\_\_:\_\_\_ - \_\_\_:\_\_\_

|                                                             |                                                                                                                  |                                                                                                                                                                                                                                                                                                                           |                             |
|-------------------------------------------------------------|------------------------------------------------------------------------------------------------------------------|---------------------------------------------------------------------------------------------------------------------------------------------------------------------------------------------------------------------------------------------------------------------------------------------------------------------------|-----------------------------|
| Images: (abdominal ultrasound, abdominal x-ray, MRI, other) | All images in the previous 3 months,<br>Urgent image: every image which was not arranged in advance              | <input type="checkbox"/> Yes, number:.....<br>with urgent indication:.....                                                                                                                                                                                                                                                | <input type="checkbox"/> No |
| Endoscopies:<br>(gastroduodenoscopy, colonoscopy)           | All endoscopies in the previous 3 months,<br>Urgent endoscopy: every endoscopy which was not arranged in advance | <input type="checkbox"/> Yes, number:.....<br>with urgent indication:.....<br>If yes, type: upper/lower GI endoscopy<br>If yes, date: □□□□.□□.□□.<br>Results:.....                                                                                                                                                        | <input type="checkbox"/> No |
| Surgeries                                                   | Surgeries performed because of IBD                                                                               | <input type="checkbox"/> Yes, if yes type:<br><input type="checkbox"/> Proctocolectomy + IPAA<br><input type="checkbox"/> proctocolectomy + ileostomy<br><input type="checkbox"/> resection<br><input type="checkbox"/> abscess drainage<br><input type="checkbox"/> fistulotomy<br><input type="checkbox"/> seton lacing | <input type="checkbox"/> No |
| Hospital admissions                                         | IBD related hospital admissions                                                                                  | <input type="checkbox"/> Yes, how many times: .....                                                                                                                                                                                                                                                                       | <input type="checkbox"/> No |
| Length of hospitalisation                                   | Number of days spent in hospital because of IBD altogether in the last 3 months                                  | ..... days                                                                                                                                                                                                                                                                                                                |                             |
| <b>Stool sample collection</b>                              | For the determination of stool calprotectin level                                                                | <input type="checkbox"/> Yes, value:.....ug/g                                                                                                                                                                                                                                                                             | <input type="checkbox"/> No |
| <b>Serum sample collection</b>                              | For the determination of ion levels, full blood count, inflammatory markers, kidney and liver functions          | <input type="checkbox"/> Yes                                                                                                                                                                                                                                                                                              | <input type="checkbox"/> No |
| Sodium                                                      |                                                                                                                  | <input type="checkbox"/> Yes, value:.....mmol/l                                                                                                                                                                                                                                                                           | <input type="checkbox"/> No |
| Potassium                                                   |                                                                                                                  | <input type="checkbox"/> Yes, value:.....mmol/l                                                                                                                                                                                                                                                                           | <input type="checkbox"/> No |
| Urea nitrogen                                               |                                                                                                                  | <input type="checkbox"/> Yes, value:.....umol/l                                                                                                                                                                                                                                                                           | <input type="checkbox"/> No |
| Creatinine                                                  |                                                                                                                  | <input type="checkbox"/> Yes, value:.....mmol/l                                                                                                                                                                                                                                                                           | <input type="checkbox"/> No |
| Total bilirubin                                             |                                                                                                                  | <input type="checkbox"/> Yes, value:.....umol/l                                                                                                                                                                                                                                                                           | <input type="checkbox"/> No |

Patient's name: \_\_\_\_\_ Date of birth: \_\_\_/\_\_\_/\_\_\_ (TRANS-IBD code# \_\_\_\_\_)  
 Form completion date (year/month/day/ hour: minute): \_\_\_/\_\_\_/\_\_\_:\_\_\_ - \_\_\_:\_\_\_

|                                                    |                                                                                                                                                |                                                 |                             |
|----------------------------------------------------|------------------------------------------------------------------------------------------------------------------------------------------------|-------------------------------------------------|-----------------------------|
| Direct bilirubin                                   |                                                                                                                                                | <input type="checkbox"/> Yes, value:.....umol/l | <input type="checkbox"/> No |
| ASAT/GOT                                           |                                                                                                                                                | <input type="checkbox"/> Yes, value:.....U/l    | <input type="checkbox"/> No |
| ALAT/GPT                                           |                                                                                                                                                | <input type="checkbox"/> Yes, value:.....U/l    | <input type="checkbox"/> No |
| Gamma GT                                           |                                                                                                                                                | <input type="checkbox"/> Yes, value:.....U/l    | <input type="checkbox"/> No |
| Alkaline Phosphatase                               |                                                                                                                                                | <input type="checkbox"/> Yes, value:.....U/l    | <input type="checkbox"/> No |
| C-reactive protein                                 |                                                                                                                                                | <input type="checkbox"/> Yes, value:.....mg/l   | <input type="checkbox"/> No |
| Erythrocyte sedimentation rate                     |                                                                                                                                                | <input type="checkbox"/> Yes, value:.....mm/h   | <input type="checkbox"/> No |
| White blood cell                                   |                                                                                                                                                | <input type="checkbox"/> Yes, value:.....G/l    | <input type="checkbox"/> No |
| Haemoglobin                                        |                                                                                                                                                | <input type="checkbox"/> Yes, value:.....g/l    | <input type="checkbox"/> No |
| Haematocrit                                        |                                                                                                                                                | <input type="checkbox"/> Yes, value:.....%      | <input type="checkbox"/> No |
| Thrombocyte                                        |                                                                                                                                                | <input type="checkbox"/> Yes, value:.....G/l    | <input type="checkbox"/> No |
| Albumin                                            |                                                                                                                                                | <input type="checkbox"/> Yes, value:.....g/l    | <input type="checkbox"/> No |
| <b>Questionnaires</b>                              | Questionnaires should be filled out on a separate paper <u>individually</u> by the participant and the parent <u>before the visit starts</u> . |                                                 |                             |
| IBDSES-A questionnaire has been filled out         |                                                                                                                                                | <input type="checkbox"/> Yes                    | <input type="checkbox"/> No |
| TRAQ questionnaire has been filled out             |                                                                                                                                                | <input type="checkbox"/> Yes                    | <input type="checkbox"/> No |
| STARx-adolescent questionnaire has been filled out |                                                                                                                                                | <input type="checkbox"/> Yes                    | <input type="checkbox"/> No |
| STARx-parent questionnaire has been filled out     |                                                                                                                                                | <input type="checkbox"/> Yes                    | <input type="checkbox"/> No |
| IMPACT-III questionnaire has been filled out       |                                                                                                                                                | <input type="checkbox"/> Yes                    | <input type="checkbox"/> No |
| CACHE questionnaire has been filled out            |                                                                                                                                                | <input type="checkbox"/> Yes                    | <input type="checkbox"/> No |

Patient's name: \_\_\_\_\_ Date of birth: \_\_\_/\_\_\_/\_\_\_ (TRANS-IBD code# \_\_\_\_\_)  
 Form completion date (year/month/day/ hour: minute): \_\_\_/\_\_\_/\_\_\_:\_\_\_ - \_\_\_:\_\_\_

|                                                                                             |                                                                                                                                       |                                                        |                             |
|---------------------------------------------------------------------------------------------|---------------------------------------------------------------------------------------------------------------------------------------|--------------------------------------------------------|-----------------------------|
| MARS-5 questionnaire has been filled out                                                    |                                                                                                                                       | <input type="checkbox"/> Yes                           | <input type="checkbox"/> No |
| <b>Reconciliation of the next visit</b>                                                     | Reconciliation of the TRANS-IBD Visit 2 was done, it should be held 3 months after the first one ( $\pm 30$ days)<br>year. month. day | <input type="checkbox"/> Yes, date:<br><br>□□□□.□□.□□. | <input type="checkbox"/> No |
| Forms of the disease activity indices for the next visit have been given to the participant |                                                                                                                                       | <input type="checkbox"/> Yes                           | <input type="checkbox"/> No |
| <b>Result of the balanced consultation (e.g. therapeutic suggestion, decision)</b>          |                                                                                                                                       |                                                        |                             |
| <b>Length of the balanced consultation (given in minutes)</b>                               | ..... minutes                                                                                                                         |                                                        |                             |

.....  
 Signature and seal of the doctor (s) present during the visit      Signature and seal of the doctor (s) present during the visit

Patient's name: \_\_\_\_\_ Date of birth: \_\_\_/\_\_\_/\_\_\_ (TRANS-IBD code# \_\_\_\_\_)  
 Form completion date (year/month/day/ hour: minute): \_\_\_/\_\_\_/\_\_\_ : \_\_\_ - \_\_\_ : \_\_\_

**TRANS-IBD Visit 2**  
**TRANS-IBD Visit 3**  
**TRANS-IBD Visit 4**

| Assessment                                                                                                   | Notes                                                                    |                                                                                                                                                                                                                        |                             |
|--------------------------------------------------------------------------------------------------------------|--------------------------------------------------------------------------|------------------------------------------------------------------------------------------------------------------------------------------------------------------------------------------------------------------------|-----------------------------|
| Patient education                                                                                            | Based on appendix 'Information sheet' prepared for TRANS-IBD visit 2/3/4 | <input type="checkbox"/> Yes                                                                                                                                                                                           | <input type="checkbox"/> No |
| <b>Physical examination</b>                                                                                  |                                                                          |                                                                                                                                                                                                                        |                             |
| Body height                                                                                                  | given in centimeter                                                      | <input type="checkbox"/> <input type="checkbox"/> <input type="checkbox"/> cm                                                                                                                                          |                             |
| Bodyweight                                                                                                   | given in kilogramm                                                       | <input type="checkbox"/> <input type="checkbox"/> <input type="checkbox"/> kg                                                                                                                                          |                             |
| Abdominal tenderness                                                                                         |                                                                          | <input type="checkbox"/> Yes                                                                                                                                                                                           | <input type="checkbox"/> No |
| Abdominal defense                                                                                            |                                                                          | <input type="checkbox"/> Yes                                                                                                                                                                                           | <input type="checkbox"/> No |
| Palpable abdominal mass                                                                                      |                                                                          | <input type="checkbox"/> Yes                                                                                                                                                                                           | <input type="checkbox"/> No |
| Perianal fistula                                                                                             | Presence of perianal fistula, abscess                                    | <input type="checkbox"/> Yes                                                                                                                                                                                           | <input type="checkbox"/> No |
| Extraintestinal manifestations                                                                               | IBD related manifestations outside the GI tract                          | <input type="checkbox"/> Yes, if yes, type:<br><input type="checkbox"/> skin symptom<br><input type="checkbox"/> joint symptom<br><input type="checkbox"/> eye symptom<br><input type="checkbox"/> liver symptom (PSC) | <input type="checkbox"/> No |
| <b>Names of the currently taken IBD related drugs</b>                                                        | <b>Drug format</b><br>(e.g.: pill, granulate, suppository)               | <b>Drug dose</b><br>(e.g.: 1x 500 mg)                                                                                                                                                                                  |                             |
|                                                                                                              |                                                                          |                                                                                                                                                                                                                        |                             |
|                                                                                                              |                                                                          |                                                                                                                                                                                                                        |                             |
|                                                                                                              |                                                                          |                                                                                                                                                                                                                        |                             |
|                                                                                                              |                                                                          |                                                                                                                                                                                                                        |                             |
|                                                                                                              |                                                                          |                                                                                                                                                                                                                        |                             |
|                                                                                                              |                                                                          |                                                                                                                                                                                                                        |                             |
| <b>Name of the drugs which caused any kind of side effect since the medical treatment of IBD was started</b> |                                                                          | <b>Side effect</b>                                                                                                                                                                                                     |                             |
|                                                                                                              |                                                                          |                                                                                                                                                                                                                        |                             |
|                                                                                                              |                                                                          |                                                                                                                                                                                                                        |                             |
|                                                                                                              |                                                                          |                                                                                                                                                                                                                        |                             |
|                                                                                                              |                                                                          |                                                                                                                                                                                                                        |                             |

Patient's name: \_\_\_\_\_ Date of birth: \_\_\_/\_\_\_/\_\_\_ (TRANS-IBD code# \_\_\_\_\_)  
 Form completion date (year/month/day/ hour: minute): \_\_\_/\_\_\_/\_\_\_ : \_\_\_ : \_\_\_

|                                                                          |                                                                                                               |                                                                                                                                                                                                                                                                                                                           |                             |
|--------------------------------------------------------------------------|---------------------------------------------------------------------------------------------------------------|---------------------------------------------------------------------------------------------------------------------------------------------------------------------------------------------------------------------------------------------------------------------------------------------------------------------------|-----------------------------|
| <b>Disease activity indices have been filled out</b>                     | In case of Crohn's disease: PCDAI, CDAI/ perianal CDAI<br>In case of ulcerative Colitis: PUCAI, Mayo score    | <input type="checkbox"/> Yes PCDAI:.....<br>PUCAI:..... Mayo score:.....<br>CDAI:..... pCDAI:.....                                                                                                                                                                                                                        | <input type="checkbox"/> No |
| <b>Health care utilisation in the previous 3 months due to IBD</b>       |                                                                                                               |                                                                                                                                                                                                                                                                                                                           |                             |
| The use of urgent healthcare service at the caring gastroenterology unit | Every medical visit which was not arranged in advance with the caring gastroenterologist                      | <input type="checkbox"/> Yes, number:.....                                                                                                                                                                                                                                                                                | <input type="checkbox"/> No |
| The use of urgent healthcare service in the emergency department         |                                                                                                               | <input type="checkbox"/> Yes, number:.....                                                                                                                                                                                                                                                                                | <input type="checkbox"/> No |
| Images: (abdominal ultrasound, abdominal x-ray, MRI, other)              | All images in the previous 3 months, Urgent image: every image which was not arranged in advance              | <input type="checkbox"/> Yes, number:..... with urgent indication:.....                                                                                                                                                                                                                                                   | <input type="checkbox"/> No |
| Endoscopies: (gastroduodenoscopy, colonoscopy)                           | All endoscopies in the previous 3 months, Urgent endoscopy: every endoscopy which was not arranged in advance | <input type="checkbox"/> Yes, number:..... with urgent indication:.....<br>If yes, type: upper/lower GI endoscopy<br>If yes, date: □□□□.□□.□□.<br>Results:.....                                                                                                                                                           | <input type="checkbox"/> No |
| Surgeries                                                                | Surgeries performed because of IBD                                                                            | <input type="checkbox"/> Yes, if yes type:<br><input type="checkbox"/> Proctocolectomy + IPAA<br><input type="checkbox"/> proctocolectomy + ileostomy<br><input type="checkbox"/> resection<br><input type="checkbox"/> abscess drainage<br><input type="checkbox"/> fistulotomy<br><input type="checkbox"/> seton lacing | <input type="checkbox"/> No |
| Hospital admissions                                                      | IBD related hospital admissions                                                                               | <input type="checkbox"/> Yes, how many times: .....                                                                                                                                                                                                                                                                       | <input type="checkbox"/> No |
| Length of hospitalisation                                                | Number of days spent in hospital because of IBD altogether in the last 3 months                               | ..... days                                                                                                                                                                                                                                                                                                                |                             |
| Other IBD and non-IBD related diseases                                   | e.g. thyroid disease, skin disease                                                                            | <input type="checkbox"/> Yes, detailed.....                                                                                                                                                                                                                                                                               | <input type="checkbox"/> No |
| <b>Serum sample collection</b>                                           | For the determination of ion levels, full blood count, inflammatory markers, kidney and liver functions       | <input type="checkbox"/> Yes                                                                                                                                                                                                                                                                                              | <input type="checkbox"/> No |

Patient's name: \_\_\_\_\_ Date of birth: \_\_\_/\_\_\_/\_\_\_ (TRANS-IBD code# \_\_\_\_\_)  
 Form completion date (year/month/day/ hour: minute): \_\_\_/\_\_\_/\_\_\_ : \_\_\_ : \_\_\_

|                                         |                                                                                                                                       |                                                                                                                                                                                                                                                                                   |                             |
|-----------------------------------------|---------------------------------------------------------------------------------------------------------------------------------------|-----------------------------------------------------------------------------------------------------------------------------------------------------------------------------------------------------------------------------------------------------------------------------------|-----------------------------|
| Sodium                                  |                                                                                                                                       | <input type="checkbox"/> Yes, value:.....mmol/l                                                                                                                                                                                                                                   | <input type="checkbox"/> No |
| Potassium                               |                                                                                                                                       | <input type="checkbox"/> Yes, value:.....mmol/l                                                                                                                                                                                                                                   | <input type="checkbox"/> No |
| Urea nitrogen                           |                                                                                                                                       | <input type="checkbox"/> Yes, value:.....umol/l                                                                                                                                                                                                                                   | <input type="checkbox"/> No |
| Creatinine                              |                                                                                                                                       | <input type="checkbox"/> Yes, value:.....mmol/l                                                                                                                                                                                                                                   | <input type="checkbox"/> No |
| Total bilirubin                         |                                                                                                                                       | <input type="checkbox"/> Yes, value:.....umol/l                                                                                                                                                                                                                                   | <input type="checkbox"/> No |
| Direct bilirubin                        |                                                                                                                                       | <input type="checkbox"/> Yes, value:.....umol/l                                                                                                                                                                                                                                   | <input type="checkbox"/> No |
| ASAT/GOT                                |                                                                                                                                       | <input type="checkbox"/> Yes, value:.....U/l                                                                                                                                                                                                                                      | <input type="checkbox"/> No |
| ALAT/GPT                                |                                                                                                                                       | <input type="checkbox"/> Yes, value:.....U/l                                                                                                                                                                                                                                      | <input type="checkbox"/> No |
| Gamma GT                                |                                                                                                                                       | <input type="checkbox"/> Yes, value:.....U/l                                                                                                                                                                                                                                      | <input type="checkbox"/> No |
| Alkaline Phosphatase                    |                                                                                                                                       | <input type="checkbox"/> Yes, value:.....U/l                                                                                                                                                                                                                                      | <input type="checkbox"/> No |
| C-reactive protein                      |                                                                                                                                       | <input type="checkbox"/> Yes, value:.....mg/l                                                                                                                                                                                                                                     | <input type="checkbox"/> No |
| Erythrocyte sedimentation rate          |                                                                                                                                       | <input type="checkbox"/> Yes, value:.....mm/h                                                                                                                                                                                                                                     | <input type="checkbox"/> No |
| White blood cell                        |                                                                                                                                       | <input type="checkbox"/> Yes, value:.....G/l                                                                                                                                                                                                                                      | <input type="checkbox"/> No |
| Haemoglobin                             |                                                                                                                                       | <input type="checkbox"/> Yes, value:.....g/l                                                                                                                                                                                                                                      | <input type="checkbox"/> No |
| Haematocrit                             |                                                                                                                                       | <input type="checkbox"/> Yes, value:.....%                                                                                                                                                                                                                                        | <input type="checkbox"/> No |
| Thrombocyte                             |                                                                                                                                       | <input type="checkbox"/> Yes, value:.....G/l                                                                                                                                                                                                                                      | <input type="checkbox"/> No |
| Albumin                                 |                                                                                                                                       | <input type="checkbox"/> Yes, value:.....g/l                                                                                                                                                                                                                                      | <input type="checkbox"/> No |
| <b>Reconciliation of the next visit</b> | Reconciliation of the TRANS-IBD Visit was done, it should be held 3 months after the current one ( $\pm$ 30 days)<br>year. month. day | <input type="checkbox"/> Yes, date:<br><br><input type="checkbox"/> <input type="checkbox"/> <input type="checkbox"/> <input type="checkbox"/> . <input type="checkbox"/> <input type="checkbox"/> <input type="checkbox"/> . <input type="checkbox"/> <input type="checkbox"/> . | <input type="checkbox"/> No |

Patient's name: \_\_\_\_\_ Date of birth: \_\_/\_\_/\_\_ (TRANS-IBD code# \_\_\_\_\_)  
 Form completion date (year/month/day/ hour: minute): \_\_/\_\_/\_\_/\_\_:\_\_ - \_\_:\_\_

|                                                                                             |               |                              |                             |
|---------------------------------------------------------------------------------------------|---------------|------------------------------|-----------------------------|
| Forms of the disease activity indices for the next visit have been given to the participant |               | <input type="checkbox"/> Yes | <input type="checkbox"/> No |
| <b>Result of the balanced consultation (e.g. therapeutic suggestion, decision)</b>          |               |                              |                             |
| <b>Length of the balanced consultation (given in minutes)</b>                               | ..... minutes |                              |                             |

.....  
 Signature and seal of the doctor (s) present during the visit      Signature and seal of the doctor (s) present during the visit

Patient's name: \_\_\_\_\_ Date of birth: \_\_\_/\_\_\_/\_\_\_ (TRANS-IBD code# \_\_\_\_\_)  
 Form completion date (year/month/day/ hour: minute): \_\_\_/\_\_\_/\_\_\_ : \_\_\_ - \_\_\_ : \_\_\_

**TRANS-IBD Visit 5  
 TRANS-IBD Visit 9**

| Demographic data                                          |  |                                                                                                                                                                                                             |
|-----------------------------------------------------------|--|-------------------------------------------------------------------------------------------------------------------------------------------------------------------------------------------------------------|
| Current studies                                           |  | <input type="checkbox"/> primary school <input type="checkbox"/> vocational training<br><input type="checkbox"/> secondary school <input type="checkbox"/> gymnasium school                                 |
| Housing conditions                                        |  | <input type="checkbox"/> house with a garden <input type="checkbox"/> row house <input type="checkbox"/><br>apartment house <input type="checkbox"/> block of flats <input type="checkbox"/><br>Other:..... |
| Family member living with the child in the same household |  | <input type="checkbox"/> parent(s) <input type="checkbox"/> brother(s)<br><input type="checkbox"/> grandparent(s)                                                                                           |
| Number of brothers                                        |  | <input type="checkbox"/> 0 <input type="checkbox"/> 1 <input type="checkbox"/> 2 <input type="checkbox"/> more than 2,<br>if more than 2, number: .....                                                     |
| Family status of parents                                  |  | <input type="checkbox"/> married <input type="checkbox"/> divorced <input type="checkbox"/> widow                                                                                                           |
| Highest education level of the mother                     |  | <input type="checkbox"/> primary school <input type="checkbox"/> vocational training<br><input type="checkbox"/> secondary school <input type="checkbox"/> college<br><input type="checkbox"/> university   |
| Highest education level of the father                     |  | <input type="checkbox"/> primary school <input type="checkbox"/> vocational training<br><input type="checkbox"/> secondary school <input type="checkbox"/> college<br><input type="checkbox"/> university   |
| Smoking habits                                            |  | <input type="checkbox"/> smoking <input type="checkbox"/> not smoking                                                                                                                                       |
| Physical examination                                      |  |                                                                                                                                                                                                             |

Patient's name: \_\_\_\_\_ Date of birth: \_\_\_/\_\_\_/\_\_\_ (TRANS-IBD code# \_\_\_\_\_)  
 Form completion date (year/month/day/ hour: minute): \_\_\_/\_\_\_/\_\_\_ : \_\_\_ - \_\_\_ : \_\_\_

|                                                                                                              |                                                                                                            |                                                                                                                                                                                                                        |                             |
|--------------------------------------------------------------------------------------------------------------|------------------------------------------------------------------------------------------------------------|------------------------------------------------------------------------------------------------------------------------------------------------------------------------------------------------------------------------|-----------------------------|
| Body height                                                                                                  | given in centimeter                                                                                        | <input type="checkbox"/> <input type="checkbox"/> <input type="checkbox"/> cm                                                                                                                                          |                             |
| Bodyweight                                                                                                   | given in kilogramm                                                                                         | <input type="checkbox"/> <input type="checkbox"/> <input type="checkbox"/> kg                                                                                                                                          |                             |
| Abdominal tenderness                                                                                         |                                                                                                            | <input type="checkbox"/> Yes                                                                                                                                                                                           | <input type="checkbox"/> No |
| Abdominal defense                                                                                            |                                                                                                            | <input type="checkbox"/> Yes                                                                                                                                                                                           | <input type="checkbox"/> No |
| Palpable abdominal mass                                                                                      |                                                                                                            | <input type="checkbox"/> Yes                                                                                                                                                                                           | <input type="checkbox"/> No |
| Perianal fistula                                                                                             | Presence of perianal fistula, abscess                                                                      | <input type="checkbox"/> Yes                                                                                                                                                                                           | <input type="checkbox"/> No |
| Extraintestinal manifestations                                                                               | IBD related manifestations outside the GI tract                                                            | <input type="checkbox"/> Yes, if yes, type:<br><input type="checkbox"/> skin symptom<br><input type="checkbox"/> joint symptom<br><input type="checkbox"/> eye symptom<br><input type="checkbox"/> liver symptom (PSC) | <input type="checkbox"/> No |
| <b>Names of the currently taken IBD related drugs</b>                                                        | <b>Drug format</b><br>(e.g.: pill, granulate, suppository)                                                 | <b>Drug dose</b><br>(e.g.: 1x 500 mg)                                                                                                                                                                                  |                             |
|                                                                                                              |                                                                                                            |                                                                                                                                                                                                                        |                             |
|                                                                                                              |                                                                                                            |                                                                                                                                                                                                                        |                             |
|                                                                                                              |                                                                                                            |                                                                                                                                                                                                                        |                             |
|                                                                                                              |                                                                                                            |                                                                                                                                                                                                                        |                             |
|                                                                                                              |                                                                                                            |                                                                                                                                                                                                                        |                             |
|                                                                                                              |                                                                                                            |                                                                                                                                                                                                                        |                             |
| <b>Name of the drugs which caused any kind of side effect since the medical treatment of IBD was started</b> |                                                                                                            | <b>Side effect</b>                                                                                                                                                                                                     |                             |
|                                                                                                              |                                                                                                            |                                                                                                                                                                                                                        |                             |
|                                                                                                              |                                                                                                            |                                                                                                                                                                                                                        |                             |
|                                                                                                              |                                                                                                            |                                                                                                                                                                                                                        |                             |
|                                                                                                              |                                                                                                            |                                                                                                                                                                                                                        |                             |
| <b>Disease activity indices have been filled out</b>                                                         | In case of Crohn's disease: PCDAI, CDAI/ perianal CDAI<br>In case of ulcerative Colitis: PUCAI, Mayo score | <input type="checkbox"/> Yes PCDAI:.....<br>PUCAI:..... Mayo score:.....<br>CDAI:..... pCDAI:.....                                                                                                                     | <input type="checkbox"/> No |
| <b>Health care utilisation in the previous 3 months due to IBD</b>                                           |                                                                                                            |                                                                                                                                                                                                                        |                             |
| The use of urgent healthcare service at the caring gastroenterology unit                                     | Every medical visit which was not arranged in advance with the caring gastroenterologist                   | <input type="checkbox"/> Yes, number:.....                                                                                                                                                                             | <input type="checkbox"/> No |
| The use of urgent healthcare service in the emergency department                                             |                                                                                                            | <input type="checkbox"/> Yes, number:.....                                                                                                                                                                             | <input type="checkbox"/> No |

Patient's name: \_\_\_\_\_ Date of birth: \_\_\_/\_\_\_/\_\_\_ (TRANS-IBD code# \_\_\_\_\_)  
 Form completion date (year/month/day/ hour: minute): \_\_\_/\_\_\_/\_\_\_ : \_\_\_ : \_\_\_

|                                                             |                                                                                                                  |                                                                                                                                                                                                                                                                                                                           |                             |
|-------------------------------------------------------------|------------------------------------------------------------------------------------------------------------------|---------------------------------------------------------------------------------------------------------------------------------------------------------------------------------------------------------------------------------------------------------------------------------------------------------------------------|-----------------------------|
| Images: (abdominal ultrasound, abdominal x-ray, MRI, other) | All images in the previous 3 months,<br>Urgent image: every image which was not arranged in advance              | <input type="checkbox"/> Yes, number:.....<br>with urgent indication:.....                                                                                                                                                                                                                                                | <input type="checkbox"/> No |
| Endoscopies: (gastroduodenoscopy, colonoscopy)              | All endoscopies in the previous 3 months,<br>Urgent endoscopy: every endoscopy which was not arranged in advance | <input type="checkbox"/> Yes, number:.....<br>with urgent indication:.....<br>If yes, type: upper/lower GI endoscopy<br>If yes, date: □□□□.□□.□□.<br>Results:.....                                                                                                                                                        | <input type="checkbox"/> No |
| Surgeries                                                   | Surgeries performed because of IBD                                                                               | <input type="checkbox"/> Yes, if yes type:<br><input type="checkbox"/> Proctocolectomy + IPAA<br><input type="checkbox"/> proctocolectomy + ileostomy<br><input type="checkbox"/> resection<br><input type="checkbox"/> abscess drainage<br><input type="checkbox"/> fistulotomy<br><input type="checkbox"/> seton lacing | <input type="checkbox"/> No |
| Hospital admissions                                         | IBD related hospital admissions                                                                                  | <input type="checkbox"/> Yes, how many times: .....                                                                                                                                                                                                                                                                       | <input type="checkbox"/> No |
| Length of hospitalisation                                   | Number of days spent in hospital because of IBD altogether in the last 3 months                                  | ..... days                                                                                                                                                                                                                                                                                                                |                             |
| Other IBD and non-IBD related diseases                      | e.g. thyroid disease, skin disease                                                                               | <input type="checkbox"/> Yes, detailed.....                                                                                                                                                                                                                                                                               | <input type="checkbox"/> No |
| <b>Stool sample collection</b>                              | For the determination of stool calprotectin level                                                                | <input type="checkbox"/> Yes, value:.....ug/g                                                                                                                                                                                                                                                                             | <input type="checkbox"/> No |
| <b>Serum sample collection</b>                              | For the determination of ion levels, full blood count, inflammatory markers, kidney and liver functions          | <input type="checkbox"/> Yes                                                                                                                                                                                                                                                                                              | <input type="checkbox"/> No |
| Sodium                                                      |                                                                                                                  | <input type="checkbox"/> Yes, value:.....mmol/l                                                                                                                                                                                                                                                                           | <input type="checkbox"/> No |
| Potassium                                                   |                                                                                                                  | <input type="checkbox"/> Yes, value:.....mmol/l                                                                                                                                                                                                                                                                           | <input type="checkbox"/> No |
| Urea nitrogen                                               |                                                                                                                  | <input type="checkbox"/> Yes, value:.....umol/l                                                                                                                                                                                                                                                                           | <input type="checkbox"/> No |
| Creatinine                                                  |                                                                                                                  | <input type="checkbox"/> Yes, value:.....mmol/l                                                                                                                                                                                                                                                                           | <input type="checkbox"/> No |

Patient's name: \_\_\_\_\_ Date of birth: \_\_\_/\_\_\_/\_\_\_ (TRANS-IBD code# \_\_\_\_\_)  
 Form completion date (year/month/day/ hour: minute): \_\_\_/\_\_\_/\_\_\_ : \_\_\_ - \_\_\_ : \_\_\_

|                                                    |                                                                                                                                                |                                                 |                             |
|----------------------------------------------------|------------------------------------------------------------------------------------------------------------------------------------------------|-------------------------------------------------|-----------------------------|
| Total bilirubin                                    |                                                                                                                                                | <input type="checkbox"/> Yes, value:.....umol/l | <input type="checkbox"/> No |
| Direct bilirubin                                   |                                                                                                                                                | <input type="checkbox"/> Yes, value:.....umol/l | <input type="checkbox"/> No |
| ASAT/GOT                                           |                                                                                                                                                | <input type="checkbox"/> Yes, value:.....U/l    | <input type="checkbox"/> No |
| ALAT/GPT                                           |                                                                                                                                                | <input type="checkbox"/> Yes, value:.....U/l    | <input type="checkbox"/> No |
| Gamma GT                                           |                                                                                                                                                | <input type="checkbox"/> Yes, value:.....U/l    | <input type="checkbox"/> No |
| Alkaline Phosphatase                               |                                                                                                                                                | <input type="checkbox"/> Yes, value:.....U/l    | <input type="checkbox"/> No |
| C-reactive protein                                 |                                                                                                                                                | <input type="checkbox"/> Yes, value:.....mg/l   | <input type="checkbox"/> No |
| Erythrocyte sedimentation rate                     |                                                                                                                                                | <input type="checkbox"/> Yes, value:.....mm/h   | <input type="checkbox"/> No |
| White blood cell                                   |                                                                                                                                                | <input type="checkbox"/> Yes, value:.....G/l    | <input type="checkbox"/> No |
| Haemoglobin                                        |                                                                                                                                                | <input type="checkbox"/> Yes, value:.....g/l    | <input type="checkbox"/> No |
| Haematocrit                                        |                                                                                                                                                | <input type="checkbox"/> Yes, value:.....%      | <input type="checkbox"/> No |
| Thrombocyte                                        |                                                                                                                                                | <input type="checkbox"/> Yes, value:.....G/l    | <input type="checkbox"/> No |
| Albumin                                            |                                                                                                                                                | <input type="checkbox"/> Yes, value:.....g/l    | <input type="checkbox"/> No |
| <b>Questionnaires</b>                              | Questionnaires should be filled out on a separate paper <u>individually</u> by the participant and the parent <u>before the visit starts</u> . |                                                 |                             |
| IBDSES-A questionnaire has been filled out         |                                                                                                                                                | <input type="checkbox"/> Yes                    | <input type="checkbox"/> No |
| TRAQ questionnaire has been filled out             |                                                                                                                                                | <input type="checkbox"/> Yes                    | <input type="checkbox"/> No |
| STARx-adolescent questionnaire has been filled out |                                                                                                                                                | <input type="checkbox"/> Yes                    | <input type="checkbox"/> No |
| STARx-parent questionnaire has been filled out     |                                                                                                                                                | <input type="checkbox"/> Yes                    | <input type="checkbox"/> No |
| IMPACT-III questionnaire has been filled out       |                                                                                                                                                | <input type="checkbox"/> Yes                    | <input type="checkbox"/> No |
| CACHE questionnaire has been filled out            |                                                                                                                                                | <input type="checkbox"/> Yes                    | <input type="checkbox"/> No |

Patient's name: \_\_\_\_\_ Date of birth: \_\_\_/\_\_\_/\_\_\_ (TRANS-IBD code# \_\_\_\_\_)  
 Form completion date (year/month/day/ hour: minute): \_\_\_/\_\_\_/\_\_\_:\_\_\_:\_\_\_

|                                                                                             |                                                                                                                                       |                                                        |                             |
|---------------------------------------------------------------------------------------------|---------------------------------------------------------------------------------------------------------------------------------------|--------------------------------------------------------|-----------------------------|
| MARS-5 questionnaire has been filled out                                                    |                                                                                                                                       | <input type="checkbox"/> Yes                           | <input type="checkbox"/> No |
| <b>Reconciliation of the next visit</b>                                                     | Reconciliation of the TRANS-IBD Visit was done, it should be held 3 months after the current one ( $\pm 30$ days)<br>year. month. day | <input type="checkbox"/> Yes, date:<br><br>□□□□.□□.□□. | <input type="checkbox"/> No |
| Forms of the disease activity indices for the next visit have been given to the participant |                                                                                                                                       | <input type="checkbox"/> Yes                           | <input type="checkbox"/> No |
| <b>Length of the consultation (given in minutes)</b>                                        | ..... minutes                                                                                                                         |                                                        |                             |

.....  
 Signature and seal of the doctor(s) present during the visit

Patient's name: \_\_\_\_\_ Date of birth: \_\_\_/\_\_\_/\_\_\_ (TRANS-IBD code# \_\_\_\_\_)  
 Form completion date (year/month/day/ hour: minute): \_\_\_/\_\_\_/\_\_\_ : \_\_\_ - \_\_\_ : \_\_\_

**TRANS-IBD Visit 6  
 TRANS-IBD Visit 7  
 TRANS-IBD Visit 8**

| <b>Physical examination</b>                                                                                  |                                                            |                                                                                                                                                                                                                        |                             |
|--------------------------------------------------------------------------------------------------------------|------------------------------------------------------------|------------------------------------------------------------------------------------------------------------------------------------------------------------------------------------------------------------------------|-----------------------------|
| Body height                                                                                                  | given in centimeter                                        | □ □ □ cm                                                                                                                                                                                                               |                             |
| Bodyweight                                                                                                   | given in kilogramm                                         | □ □ □ kg                                                                                                                                                                                                               |                             |
| Abdominal tenderness                                                                                         |                                                            | <input type="checkbox"/> Yes                                                                                                                                                                                           | <input type="checkbox"/> No |
| Abdominal defense                                                                                            |                                                            | <input type="checkbox"/> Yes                                                                                                                                                                                           | <input type="checkbox"/> No |
| Palpable abdominal mass                                                                                      |                                                            | <input type="checkbox"/> Yes                                                                                                                                                                                           | <input type="checkbox"/> No |
| Perianal fistula                                                                                             | Presence of perianal fistula, abscess                      | <input type="checkbox"/> Yes                                                                                                                                                                                           | <input type="checkbox"/> No |
| Extraintestinal manifestations                                                                               | IBD related manifestations outside the GI tract            | <input type="checkbox"/> Yes, if yes, type:<br><input type="checkbox"/> skin symptom<br><input type="checkbox"/> joint symptom<br><input type="checkbox"/> eye symptom<br><input type="checkbox"/> liver symptom (PSC) | <input type="checkbox"/> No |
| <b>Names of the currently taken IBD related drugs</b>                                                        | <b>Drug format</b><br>(e.g.: pill, granulate, suppository) | <b>Drug dose</b><br>(e.g.: 1x 500 mg)                                                                                                                                                                                  |                             |
|                                                                                                              |                                                            |                                                                                                                                                                                                                        |                             |
|                                                                                                              |                                                            |                                                                                                                                                                                                                        |                             |
|                                                                                                              |                                                            |                                                                                                                                                                                                                        |                             |
|                                                                                                              |                                                            |                                                                                                                                                                                                                        |                             |
|                                                                                                              |                                                            |                                                                                                                                                                                                                        |                             |
| <b>Name of the drugs which caused any kind of side effect since the medical treatment of IBD was started</b> |                                                            | <b>Side effect</b>                                                                                                                                                                                                     |                             |
|                                                                                                              |                                                            |                                                                                                                                                                                                                        |                             |
|                                                                                                              |                                                            |                                                                                                                                                                                                                        |                             |
|                                                                                                              |                                                            |                                                                                                                                                                                                                        |                             |
|                                                                                                              |                                                            |                                                                                                                                                                                                                        |                             |

Patient's name: \_\_\_\_\_ Date of birth: \_\_\_/\_\_\_/\_\_\_ (TRANS-IBD code# \_\_\_\_\_)  
 Form completion date (year/month/day/ hour: minute): \_\_\_/\_\_\_/\_\_\_ : \_\_\_ - \_\_\_ : \_\_\_

|                                                                          |                                                                                                               |                                                                                                                                                                                                                                                                                                                           |                             |
|--------------------------------------------------------------------------|---------------------------------------------------------------------------------------------------------------|---------------------------------------------------------------------------------------------------------------------------------------------------------------------------------------------------------------------------------------------------------------------------------------------------------------------------|-----------------------------|
| <b>Disease activity indices have been filled out</b>                     | In case of Crohn's disease: PCDAI, CDAI/ perianal CDAI<br>In case of ulcerative Colitis: PUCAI, Mayo score    | <input type="checkbox"/> Yes PCDAI:.....<br>PUCAI:..... Mayo score:.....<br>CDAI:..... pCDAI:.....                                                                                                                                                                                                                        | <input type="checkbox"/> No |
| <b>Health care utilisation in the previous 3 months due to IBD</b>       |                                                                                                               |                                                                                                                                                                                                                                                                                                                           |                             |
| The use of urgent healthcare service at the caring gastroenterology unit | Every medical visit which was not arranged in advance with the caring gastroenterologist                      | <input type="checkbox"/> Yes, number:.....                                                                                                                                                                                                                                                                                | <input type="checkbox"/> No |
| The use of urgent healthcare service in the emergency department         |                                                                                                               | <input type="checkbox"/> Yes, number:.....                                                                                                                                                                                                                                                                                | <input type="checkbox"/> No |
| Images: (abdominal ultrasound, abdominal x-ray, MRI, other)              | All images in the previous 3 months, Urgent image: every image which was not arranged in advance              | <input type="checkbox"/> Yes, number:.....<br>with urgent indication:.....                                                                                                                                                                                                                                                | <input type="checkbox"/> No |
| Endoscopies: (gastroduodenoscopy, colonoscopy)                           | All endoscopies in the previous 3 months, Urgent endoscopy: every endoscopy which was not arranged in advance | <input type="checkbox"/> Yes, number:.....<br>with urgent indication:.....<br>If yes, type: upper/lower GI endoscopy<br>If yes, date: □□□□.□□.□□.<br>Results:.....                                                                                                                                                        | <input type="checkbox"/> No |
| Surgeries                                                                | Surgeries performed because of IBD                                                                            | <input type="checkbox"/> Yes, if yes type:<br><input type="checkbox"/> Proctocolectomy + IPAA<br><input type="checkbox"/> proctocolectomy + ileostomy<br><input type="checkbox"/> resection<br><input type="checkbox"/> abscess drainage<br><input type="checkbox"/> fistulotomy<br><input type="checkbox"/> seton lacing | <input type="checkbox"/> No |
| Hospital admissions                                                      | IBD related hospital admissions                                                                               | <input type="checkbox"/> Yes, how many times: .....                                                                                                                                                                                                                                                                       | <input type="checkbox"/> No |
| Length hospitalisation                                                   | Number of days spent in hospital because of IBD altogether in the last 3 months                               | ..... days                                                                                                                                                                                                                                                                                                                |                             |
| Other IBD and non-IBD related diseases                                   | e.g. thyroid disease, skin disease                                                                            | <input type="checkbox"/> Yes, detailed.....                                                                                                                                                                                                                                                                               | <input type="checkbox"/> No |
| <b>Serum sample collection</b>                                           | For the determination of ion levels, full blood count, inflammatory markers, kidney and liver functions       | <input type="checkbox"/> Yes                                                                                                                                                                                                                                                                                              | <input type="checkbox"/> No |

Patient's name: \_\_\_\_\_ Date of birth: \_\_\_/\_\_\_/\_\_\_ (TRANS-IBD code# \_\_\_\_\_)  
 Form completion date (year/month/day/ hour: minute): \_\_\_/\_\_\_/\_\_\_ : \_\_\_ : \_\_\_

|                                                                                             |                                                                                                                                       |                                                    |                             |
|---------------------------------------------------------------------------------------------|---------------------------------------------------------------------------------------------------------------------------------------|----------------------------------------------------|-----------------------------|
| Sodium                                                                                      |                                                                                                                                       | <input type="checkbox"/> Yes, value:.....mmol/l    | <input type="checkbox"/> No |
| Potassium                                                                                   |                                                                                                                                       | <input type="checkbox"/> Yes, value:.....mmol/l    | <input type="checkbox"/> No |
| Urea nitrogen                                                                               |                                                                                                                                       | <input type="checkbox"/> Yes, value:.....umol/l    | <input type="checkbox"/> No |
| Creatinine                                                                                  |                                                                                                                                       | <input type="checkbox"/> Yes, value:.....mmol/l    | <input type="checkbox"/> No |
| Total bilirubin                                                                             |                                                                                                                                       | <input type="checkbox"/> Yes, value:.....umol/l    | <input type="checkbox"/> No |
| Direct bilirubin                                                                            |                                                                                                                                       | <input type="checkbox"/> Yes, value:.....umol/l    | <input type="checkbox"/> No |
| ASAT/GOT                                                                                    |                                                                                                                                       | <input type="checkbox"/> Yes, value:.....U/l       | <input type="checkbox"/> No |
| ALAT/GPT                                                                                    |                                                                                                                                       | <input type="checkbox"/> Yes, value:.....U/l       | <input type="checkbox"/> No |
| Gamma GT                                                                                    |                                                                                                                                       | <input type="checkbox"/> Yes, value:.....U/l       | <input type="checkbox"/> No |
| Alkaline Phosphatase                                                                        |                                                                                                                                       | <input type="checkbox"/> Yes, value:.....U/l       | <input type="checkbox"/> No |
| C-reactive protein                                                                          |                                                                                                                                       | <input type="checkbox"/> Yes, value:.....mg/l      | <input type="checkbox"/> No |
| Erythrocyte sedimentation rate                                                              |                                                                                                                                       | <input type="checkbox"/> Yes, value:.....mm/h      | <input type="checkbox"/> No |
| White blood cell                                                                            |                                                                                                                                       | <input type="checkbox"/> Yes, value:.....G/l       | <input type="checkbox"/> No |
| Haemoglobin                                                                                 |                                                                                                                                       | <input type="checkbox"/> Yes, value:.....g/l       | <input type="checkbox"/> No |
| Haematocrit                                                                                 |                                                                                                                                       | <input type="checkbox"/> Yes, value:.....%         | <input type="checkbox"/> No |
| Thrombocyte                                                                                 |                                                                                                                                       | <input type="checkbox"/> Yes, value:.....G/l       | <input type="checkbox"/> No |
| Albumin                                                                                     |                                                                                                                                       | <input type="checkbox"/> Yes, value:.....g/l       | <input type="checkbox"/> No |
| <b>Reconciliation of the next visit</b>                                                     | Reconciliation of the TRANS-IBD Visit was done, it should be held 3 months after the current one ( $\pm$ 30 days)<br>year. month. day | <input type="checkbox"/> Yes, date:<br>□□□□.□□.□□. | <input type="checkbox"/> No |
| Forms of the disease activity indices for the next visit have been given to the participant |                                                                                                                                       | <input type="checkbox"/> Yes                       | <input type="checkbox"/> No |

Patient's name: \_\_\_\_\_ Date of birth: \_\_/\_\_/\_\_ (TRANS-IBD code# \_\_\_\_\_)  
Form completion date (year/month/day/ hour: minute): \_\_/\_\_/\_\_/\_\_:\_\_ - \_\_:\_\_

|                                                  |               |
|--------------------------------------------------|---------------|
| Length of the consultation<br>(given in minutes) | ..... minutes |
|--------------------------------------------------|---------------|

.....  
Signature and seal of the doctor(s) present during the visit
